# Validación experimental de modelos matemáticos de consorcio microalgas-bacterias en aplicaciones para el tratamiento de agua residual institucional

## *Experimental validation of mathematical models of microalgae-bacteria consortium in applications for institutional wastewater treatment*

David Santiago Herrera Santana<sup>a1\*</sup>, Diana Esmeralda Sarmiento Riaño<sup>a2</sup> y Gustavo Andrés Baquero Rodríguez<sup>a3</sup>

<sup>a</sup> Facultad de Ingeniería, Programa de Ingeniería Ambiental, Universidad Militar Nueva Granada, Cajicá, Colombia.

E-mail: <sup>a1</sup>est.davids.herrera@unimilitar.edu.co, <sup>a2</sup>est.diana.sarmiento@unimilitar.edu.co, <sup>a3</sup>gustavo.baquero@unimilitar.edu.co

\*Autor para correspondencia

Recibido: 02/07/2023

Aceptado: 28/12/2023

Publicado: 31/01/2024

**Citar como:** Herrera-Santana, D.S., Sarmiento-Riaño, D.E., Baquero-Rodríguez, G.A. 2024. Experimental validation of mathematical models of microalgae-bacteria consortium in applications for institutional wastewater treatment. *Ingeniería del agua*, 28(1), 65-81. <https://doi.org/10.4995/ia.2024.20117>

## RESUMEN

El objetivo de este trabajo es validar la representatividad de dos modelos matemáticos, para aplicaciones de tratamiento de agua residual con consorcios microalgas-bacterias. Los modelos se validaron utilizando datos recolectados en condiciones ambientales de la Sabana de Bogotá (Colombia). La experimentación evaluó escenarios con diferentes proporciones de microalgas:agua residual, midió el crecimiento de la biomasa, así como la remoción de contaminantes. Los resultados muestran que los modelos representan el comportamiento de la biomasa, pero no son capaces de predecir la remoción de contaminantes del agua. Se observó remoción de DQO debido a las interacciones entre el consorcio de microalgas y bacterias, los mejores resultados fueron obtenidos en el escenario 25% de microalgas y 75% de agua residual. En general, el monitoreo del proceso de tratamiento demostró la producción de biomasa y la mejora en la calidad del agua tratada.

**Palabras clave** | consorcio microalgas-bacterias; tratamientos avanzados de aguas residuales; modelos matemáticos aguas residuales; biorremediación; fotobiorreactor; producción de biomasa; remoción de contaminantes.

## ABSTRACT

*The objective of this work is to validate the reliability of two mathematical models for wastewater treatment using a microalgae-bacteria consortium. These models were validated using data from tests conducted under environmental conditions in the Sabana de Bogotá region of Colombia. The experimental methods comprise different scenarios with varying proportions of microalgae-bacteria to wastewater, measuring both biomass growth and contaminant removal. The results indicate that the models successfully represent biomass behavior but are limited in predicting contaminant removal from the water. Nonetheless, significant removal of COD was observed due to the interactions between the microalgae-bacteria consortium. The most promising results were obtained in the scenario with a composition of 25% microalgae and 75% of wastewater. In conclusion, the treatment process monitoring demonstrated effective biomass production and improved water quality in the treated samples. However, further research is needed to enhance the predictive capabilities of the mathematical models regarding contaminant removal.*

**Key words** | microalgae-bacteria consortia; validation of mathematical models; advanced wastewater treatments; wastewater mathematical models; bioremediation; photobioreactor; biomass production; pollutant removal.

## INTRODUCCIÓN

El consorcio de microalgas-bacterias se ha destacado como un proceso biológico para el tratamiento de agua residual, logrando la remoción efectiva de materia orgánica, nutrientes y patógenos (Alam y Wang, 2019; Sahu *et al.*, 2019). Este proceso de biorremediación es complejo, con interacciones químicas, procesos simultáneos entre microalgas y bacterias e influencia de las condiciones ambientales. A pesar de lo anterior se ha avanzado en su comprensión y se ha posicionado como una solución natural para el tratamiento de agua residual doméstica e industrial (Solimeno, 2017).

En este proceso, las microalgas autótrofas utilizan la luz y el carbono inorgánico como fuente de energía, otras microalgas por su parte tienen la capacidad de consumir carbono orgánico e inorgánico que actúa como fuente de carbono en un medio de cultivo mixotrófico. En ambos casos se estimula la producción de biomasa y la eliminación de contaminantes. La fotosíntesis de las microalgas, gracias a la luz y el carbono, produce oxígeno, que las bacterias utilizan para oxidar la materia orgánica y generar dióxido de carbono, que a su vez es utilizado por las algas como sustrato (Alam y Wang, 2019). Esta relación simbiótica basada en el intercambio de gases representa ventajas al tratamiento de agua residual, especialmente en la reducción de cargas orgánicas. Además del carbono, los microorganismos también aprovechan el fósforo y el nitrógeno disueltos en el agua (en forma de amonio, nitrito y nitrato), que si no es tratado adecuadamente puede generar problemas medioambientales como daño a los ecosistemas acuáticos por la eutrofización en los cuerpos de agua (Von Sperling, 2007), y problemas de salud pública, por la posibilidad de que pueda infiltrarse en fuentes de agua potable (Wu *et al.*, 2021). Lo anterior, convierte al consorcio microalgas-bacterias en una medida alternativa de tratamiento aeróbico que implica la remoción de nutrientes que pueden generar problemas en el ambiente (Sahu *et al.*, 2019). Esta capacidad lo posiciona como una solución no convencional con mayor eficiencia de remoción en comparación con sistemas que emplean solo bacterias o solo microalgas (Aditya *et al.*, 2022).

Las condiciones en las que se desarrolla el cultivo son relevantes para el proceso de tratamiento. La temperatura, el pH y la intensidad de luz son parámetros de gran importancia para el crecimiento y el estado de las microalgas. La temperatura influye directamente en la actividad enzimática y metabólica de las microalgas, mientras que el pH afecta la disponibilidad y asimilación de nutrientes en el agua, siendo óptimo en el rango de 7 a 9 para la mayoría de las especies. La intensidad de luz está relacionada con la conversión de la luz en energía química mediante la fotosíntesis y la producción de oxígeno (Alam y Wang, 2019; Singh *et al.*, 2015). Sin embargo, es importante tener en cuenta que concentraciones elevadas de oxígeno (>20 mg/L) pueden afectar la productividad fotosintética del cultivo y dañar las células de las microalgas debido a la fotooxidación, lo cual reduce la eficiencia de remoción (Sahu *et al.*, 2019).

En comparación con los procesos convencionales, el consorcio microalgas-bacterias representa una alternativa innovadora y un paso hacia un nuevo enfoque en el tratamiento de agua residual. Se basa en tres aspectos fundamentales: la reducción del consumo energético de la infraestructura para el tratamiento del agua, la incorporación de los conceptos de biorrefinería y economía circular, y el potencial de utilización como sumidero de carbono.

En cuanto a el consumo energético asociado al proceso convencional de tratamiento del agua, los costos de energía constituyen la segunda fuente de gastos más representativa, únicamente superados por los costos de la mano de obra (Metcalf y Eddy, 2013). Esto no solo resulta en altos costos de electricidad, sino también en un aumento de las emisiones de gases de efecto invernadero, especialmente en áreas de gran altitud donde la fuerza motriz para la transferencia de oxígeno es menor (Baquero-Rodríguez *et al.*, 2022). Este desafío es uno de los principales problemas en el tratamiento aeróbico convencional, y las microalgas se presentan como una opción viable para la oxigenación del agua residual, ya que reducen significativamente la energía requerida en la aireación difusa, ahorrando más del 50% del consumo energético (Solimeno, 2017).

Los consorcios de microalgas-bacterias ofrecen una alternativa a los tratamientos convencionales debido al potencial de aprovechamiento de la biomasa residual, que se alinea con los conceptos de biorrefinería y economía circular. Por un lado, estos consorcios permiten la conversión de la biomasa residual en materias primas como combustibles, energía y bioplásticos (Javed *et al.*, 2019; Bhatia *et al.*, 2021; Roy Chong *et al.*, 2022). Al mismo tiempo, se reincorpora un residuo al mercado como un bien con aplicaciones comerciales (Calicioglu y Demirel, 2022).

En cuanto a su función como sumidero de carbono, se ha identificado el potencial del tratamiento con microalgas como proceso para la captura y almacenamiento de carbono, aprovechando su capacidad para fijar el dióxido de carbono y producir

biomasa. Se han considerado tanto la inyección de dióxido de carbono atmosférico como la utilización de gases de combustión como alternativas para tratar el agua residual y almacenar carbono residual (Onyeaka *et al.*, 2021).

Este sistema también cuenta con inconvenientes, incluyendo: la presencia de contaminantes biológicos que pueden influenciar la producción y calidad de la biomasa, la influencia de las condiciones operacionales y medioambientales y la separación/valorización de la biomasa (Molinuevo-Salces *et al.*, 2019).

Si bien la información documentada sobre el tratamiento de agua residual utilizando consorcios microalgas-bacterias aún es limitada, ha aumentado considerablemente desde principios del siglo XXI. Aunque este progreso es positivo a escala global, aún falta información clara sobre valores de referencia para el diseño y la optimización del tratamiento, como la que existe en otros procesos convencionales, como los lodos activados, que tienen procesos bien conocidos y una amplia experiencia con información específica para el dimensionamiento y modelación matemática.

Los modelos de microalgas-bacterias priorizan el cálculo de la producción de biomasa por encima de la remoción de contaminantes en el agua y adoptan diferentes variables que no son necesariamente aplicables universalmente. Por ejemplo, el modelo de oxígeno disuelto se basa en una representación tradicional y no considera la sobresaturación del gas en el agua ni los procesos físicos que rigen la transferencia de gases al agua.

En conclusión, es necesario validar la representatividad de los modelos existentes mediante datos experimentales para evaluar su capacidad de predicción. En este caso, se utilizaron los modelos de Zambrano de 2016 y BIO\_ALGAE de 2017, estos modelos fueron implementados con datos de pruebas adelantadas en las condiciones ambientales de la Sabana de Bogotá (2600 m s.n.m., 0.76 atmósferas, Temperatura ambiente promedio 16 °C).

---

## MATERIAL Y MÉTODOS

### Análisis bibliométrico

Se realizó un análisis bibliométrico utilizando la base de datos de referencias bibliográficas y citas *Scopus*, de la empresa Elsevier. La ecuación de búsqueda usada para esta consulta fue Wastewater AND treatment AND microalgae AND bacteria AND model en los años 2001 a 2023. El análisis buscó recopilar información sobre el tratamiento de aguas residuales utilizando microalgas y bacterias, y se realizaron búsquedas adicionales relacionadas con la calidad del agua. Se utilizó el software VOSviewer para generar un mapa bibliométrico.

### Cultivo inicial de las microalgas

Se realizó un cultivo inicial de microalgas utilizando una muestra puntual de agua tomada de una laguna de pulimiento que recibe el efluente de un proceso de lodos activados convencional que trata las aguas residuales de un campus Universitario. El cultivo se llevó a cabo en un recipiente plástico, transparente en donde se dispuso 1.5 L de la muestra, expuesta a luz natural, sin exposición directa al sol, con variaciones día-noche (fotoperiodo de 12 horas). Como fuente de sustrato se utilizó caldo de gallina deshidratado (marca comercial Maggi). La dosificación del sustrato fue la siguiente: 1 g/L, tres días por semana, durante dos meses. Adicionalmente el cultivo se mantuvo con aireación constante (caudal 2 L/min) para evitar la sedimentación de las microalgas. El crecimiento de la población de microalgas se estimó mediante absorbancia de la clorofila de las células vivas (longitud de onda de 665 nm), utilizando un espectrofotómetro (Pharo 100). Se tomaron muestras del cultivo inicial (500 mL) para inocular nuevos cultivos en agua limpia (1 L), que posteriormente fueron alimentados con agua residual efluente del tratamiento preliminar de la planta de tratamiento de aguas residuales del campus universitario, la caracterización de este efluente es la siguiente: DQO de 208.53 mg/L, DBO<sub>5</sub> de 156.12 mg/L, SST de 97.81 mg/L, ion amonio de 51.49 mg/L, ion nitrato de 4.04 mg/L, pH de 7.67 y temperatura de 16.03 °C.

## Definición y configuración de escenarios de evaluación

Se establecieron tres escenarios para evaluar el crecimiento y el comportamiento de las microalgas durante su aplicación para la remoción de contaminantes del agua residual. En la Tabla 1 se detallan los porcentajes de cultivo de microalgas y agua residual asignados a cada escenario en relación con el volumen total del biorreactor (38.4 L). Además, se proporciona información sobre el volumen correspondiente a cada porcentaje.

**Tabla 1** | Porcentajes y volúmenes de cultivo de microalgas y agua residual en cada escenario.

| Escenario | Cultivo microalgas [%] | Agua residual [%] | Cultivo microalgas [L] | Agua residual [L] |
|-----------|------------------------|-------------------|------------------------|-------------------|
| 1         | 25                     | 75                | 8.7                    | 26.1              |
| 2         | 50                     | 50                | 17.4                   | 17.4              |
| 3         | 75                     | 25                | 26.1                   | 8.7               |

## Configuración del montaje de evaluación

Las pruebas se llevaron a cabo en un reactor agitado utilizado como biorreactor en el banco de pruebas CE 702 de GUNT Hamburg, las condiciones en las que se adelantaron las pruebas se presentan en la Figura 1.

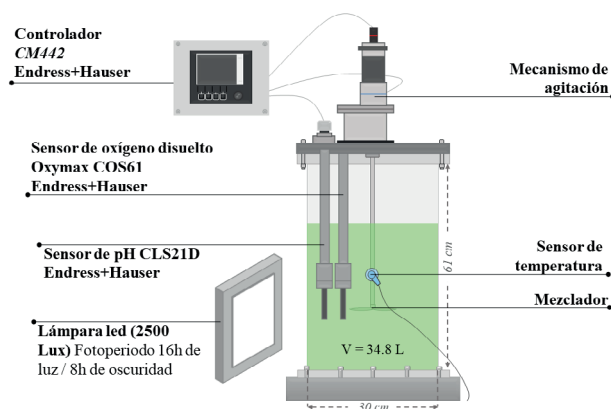

**Figura 1** | Esquema del reactor agitado usado para el desarrollo del estudio.

## Metodología de evaluación de los escenarios

La evaluación de los escenarios se adelantó a partir de la medición de parámetros fisicoquímicos de calidad del agua siguiendo la metodología propuesta por Baird *et al.* (2017) que proporciona métodos estandarizados para analizar y evaluar la calidad del agua.

## Metodología de identificación de las microalgas

Se realizó la identificación de las microalgas por género a partir de la observación de las características morfológicas de los individuos usando el microscopio óptico de referencia OLYMPUS CH2 usando aumento de 400x. Se registró la forma celular, cantidad de células, tamaño, la presencia de flagelos y de cloroplastos. Posteriormente se compararon los resultados obtenidos usando como referencia la información plasmada en los trabajos de Núñez (2008) y Van Vuuren *et al.* (2006).

## Modelación de crecimiento y remoción

La validación experimental fue realizada mediante la implementación de dos modelos matemáticos:

### Modelo de Zambrano

En este estudio, se implementó y validó el Modelo de Zambrano *et al.* (2016). El modelo se implementó en Excel y fue evaluado en cinco instantes diferentes distribuidos a lo largo de los trece días de evaluación para cada escenario. Los datos de entrada requeridos por el modelo incluyeron la irradiancia, las concentraciones de dióxido de carbono, nitrógeno amoniacal, nitrato, oxígeno disuelto, así como la concentración de biomasa de microalgas y bacterias. Estos datos se obtuvieron experimentalmente, excepto la concentración de bacterias en el agua residual, que se asumió según la literatura (Solimeno *et al.*, 2017).

En la modelación se utilizaron valores predeterminados para las constantes de semisaturación, las fracciones de dióxido de carbono y nitrógeno en las microalgas. Los rendimientos de las algas sobre el sustrato se basaron en la relación estequiométrica para su crecimiento. La tasa de crecimiento específico de las microalgas se calculó utilizando una ecuación que considera la biomasa y el tiempo de diferencia en la producción de biomasa (Reichert *et al.*, 2001). Las tasas de crecimiento de bacterias y de decaimiento se adaptaron según lo reportado en un modelo previo.

Los procesos implementados en el modelo incluyen el crecimiento de microalgas en nitrógeno amoniacal y nitrato, junto con la transferencia de oxígeno. Para comparar los datos simulados con los resultados experimentales se sumó el crecimiento de microalgas en nitrógeno amoniacal y nitrato, se estableció una relación entre la DQO y los SST. La dispersión se evaluó mediante la desviación estándar, y se presentaron gráficamente los datos experimentales y los datos simulados acompañados de los límites superior e inferior.

En cuanto a la transferencia de oxígeno en el agua, se consideraron tres variables: el coeficiente de transferencia de masa del oxígeno ( $k_L a$ ), la concentración de saturación del gas y la concentración del oxígeno en un momento determinado. El  $k_L a$  se determinó utilizando una metodología desarrollada por la American Society of Civil Engineers (ASCE) para la evaluación de la transferencia de oxígeno mediante aireación difusa. La aplicación de este método en procesos con el consorcio microalgas-bacterias es desconocida.

Finalmente, se compararon los valores experimentales con los datos simulados utilizando la desviación estándar como medida de dispersión, lo anterior permitió evaluar el ajuste de los resultados del modelo a los datos experimentales.

### Modelo BIO\_ALGAE

Se implementó y simuló el modelo propuesto por Solimeno *et al.* (2017), este modelo incluye los procesos relacionados con el crecimiento, respiración y muerte de las microalgas, así como la transferencia de oxígeno. Durante la simulación se utilizaron datos experimentales y calculados, incluyendo la concentración de microalgas, tasa máxima de crecimiento, dióxido de carbono, bicarbonato, nitrógeno amoniacal, amonio, nitrato, fosfato, oxígeno disuelto, temperatura, concentración de saturación de oxígeno disuelto, intensidad de luz y coeficiente de transferencia de masa para oxígeno.

El crecimiento de las microalgas se modeló en función del consumo de amonio ( $\text{NH}_4^+$ ) y nitrato ( $\text{NO}_3^-$ ), dividiéndose en dos procesos diferentes. Se consideró la suma de estos procesos como el crecimiento total de las microalgas y se relacionó en términos de DQO y SST para comparar los datos experimentales con los simulados. Se calculó la desviación estándar entre ambos conjuntos de datos y se presentó gráficamente, considerando los límites y la variabilidad de los datos simulados.

La modelación de la respiración endógena y el decaimiento de las microalgas se realizó mediante el cálculo del factor fotosintético térmico ( $\eta_{PS}$  ( $\text{I}, \text{SO}_2$ )), para este cálculo se consideró una temperatura óptima para las microalgas de 25 °C según lo reportado por la literatura (Jacob-Lopes *et al.*, 2020). La temperatura medida se determinó como el promedio diario de los datos recopilados en el día simulado. La constante de decaimiento de las microalgas ( $K_{\text{death,ALG}}$ ) se calculó a partir de la relación entre la tasa de crecimiento ( $\mu_{\text{ALG}}$ ) y la constante de decaimiento ( $K_{\text{death,ALG}}$ ) según el modelo BIO\_ALGAE, estableciendo una equivalencia en la que  $\mu_{\text{ALG}}$  es 15 veces  $K_{\text{death,ALG}}$ .

Para la medición de la transferencia de oxígeno, se aplicó la metodología sugerida por la American Society of Civil Engineers (ASCE).





## Calidad del agua

### Concentración de oxígeno disuelto

La variación de la concentración de oxígeno en el reactor se presenta en la Figura 4, el patrón descrito en la figura muestra incrementos periódicos en la concentración, asociado a la producción de oxígeno por parte de las microalgas durante la fotosíntesis. También se presenta una disminución en la concentración que puede explicarse por la transferencia del oxígeno a la atmósfera, cuando la concentración del oxígeno es mayor que en el equilibrio con el aire se genera la desorción del gas a la atmósfera (Barceló-Villalobos *et al.*, 2018). El segundo proceso es la respiración por parte del consorcio de microalgas-bacterias que sucede simultáneamente a la desorción del oxígeno. Esto implica que una proporción del gas es usada por los microorganismos para la degradación de la materia orgánica en forma de DQO (Alam y Wang, 2019).

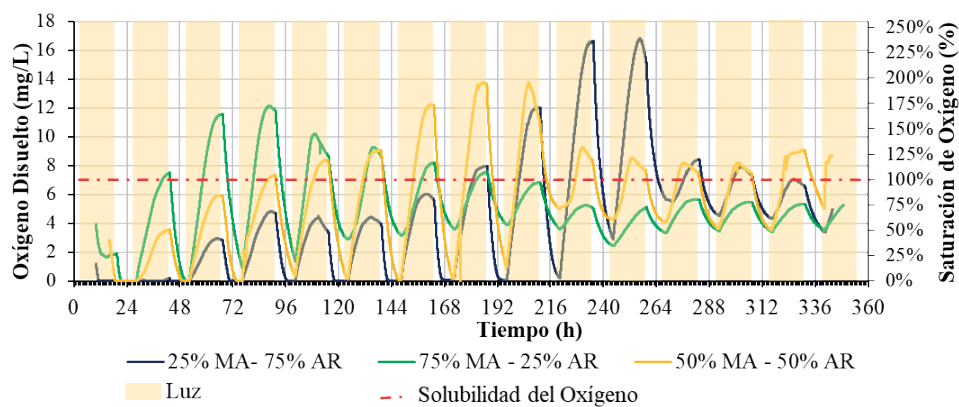

**Figura 4** | Concentración de oxígeno disuelto junto con el porcentaje de saturación en función del tiempo.

En los primeros días de los escenarios evaluados (ver Figura 5), el oxígeno producido es usado para la oxidación de la fracción biodegradable soluble, alcanzando la ausencia de oxígeno (0 mg/L) inicialmente, con el paso del tiempo se estabiliza la producción y el consumo de oxígeno. Este equilibrio indicaría que las microalgas y bacterias alcanzaron su punto máximo de remoción de DQO (Lee *et al.*, 2019).

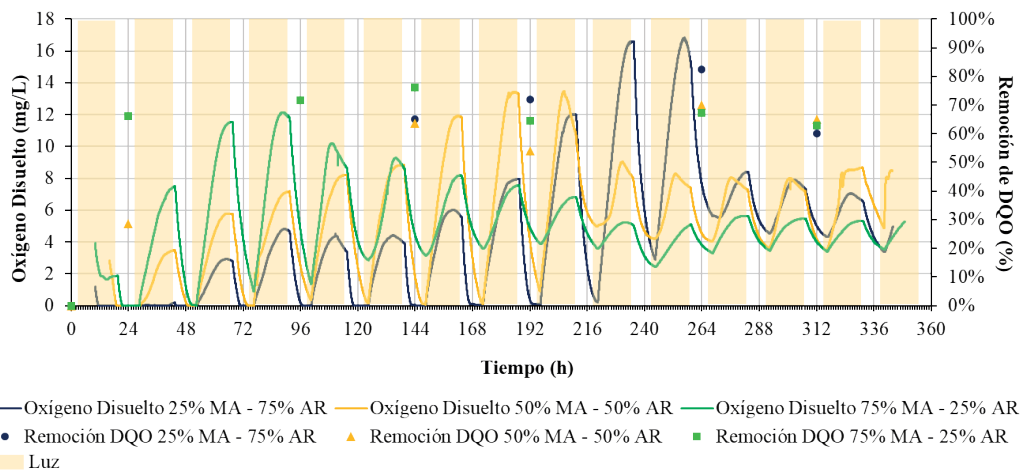

**Figura 5** | Remoción de DQO y concentración de oxígeno en función del tiempo.

## Sobresaturación de oxígeno

Se evaluaron tres escenarios, la concentración de saturación de oxígeno en el agua superó los valores de solubilidad asociados a las condiciones ambientales locales. Este aumento en la concentración hasta el punto de saturación se debe a la transferencia de gas por parte de las microalgas, que liberan oxígeno en forma de microburbujas. A medida que estas burbujas ascienden en la columna de agua, disminuyen de tamaño, lo que aumenta la presión parcial del gas y, según la ley de Henry, resulta en una mayor concentración de oxígeno disuelto (Matsuki *et al.*, 2014).

Sin embargo, cuando la concentración de oxígeno excede el punto de saturación, no está claro qué sucede, a pesar de que este comportamiento se ha observado con frecuencia. La literatura sobre el intercambio de oxígeno en estos sistemas es limitada, aunque se ha sugerido que las microburbujas colapsan antes de llegar a la superficie debido a su corto ciclo de vida y a la disminución de su tamaño. Esto evita que las burbujas hagan contacto con la atmósfera y desaparezcan bajo el agua (Takahashi *et al.*, 2007). Los resultados también revelaron una relación inversa entre la masa de oxígeno sobresaturada y la proporción de biomasa de microalgas en cada escenario (ver Tabla 2). En otras palabras, a menor proporción inicial de microalgas, mayor es la cantidad de oxígeno que sobrepasa la saturación. Esto se explica por la relación entre el sustrato disponible en forma de CO<sub>2</sub> y los microorganismos que lo consumen. En escenarios con menor proporción inicial de microalgas, el cambio en esta relación es menor en comparación con escenarios con una mayor proporción inicial de microalgas (Zhao *et al.*, 2015).

**Tabla 2** | Masa de oxígeno acumulada en el periodo de evaluación (13 días) para cada escenario.

| Escenario                                | Masa O <sub>2</sub> acumulada que superó la saturación en 13 días de evaluación [g] |
|------------------------------------------|-------------------------------------------------------------------------------------|
| 25% de microalgas - 75% de agua residual | 505.8                                                                               |
| 50% de microalgas - 50% de agua residual | 479.6                                                                               |
| 75% de microalgas - 25% de agua residual | 269.7                                                                               |

## Equilibrio

En los tres escenarios la concentración del oxígeno llega a una fase de equilibrio en los puntos máximos y mínimos de concentración en tiempos distintos (ver Figura 4), lo cual indica que se ha estabilizado la concentración de DQO y ha llegado a su punto máximo de remoción. Esto se explica porque ya no hay materia orgánica oxidable disponible

## Efecto de la temperatura en la saturación de oxígeno

La temperatura se ha reportado en la literatura como uno de los factores más influyentes en la solubilidad del oxígeno en el agua (Krause y Benson, 1984), en los resultados obtenidos (ver Figura 6) no se destaca una variación importante en la saturación, dado que el rango de temperatura en el cual se desarrolla el cultivo no cambia considerablemente (de 17 a 20 °C). En la figura se denota la saturación del oxígeno para cada dato de temperatura, siendo la línea roja punteada el punto de referencia para identificar los valores en sobresaturación (sobrepasan la línea).

## Demanda química de oxígeno

La concentración de biomasa también afectó la remoción, demostrando que una mayor proporción de microalgas se relacionó con una mayor eliminación de DQO en procesos por lotes.

Inicialmente en el escenario con 75% de microalgas y 25% de agua residual, la remoción era mayor que en los demás escenarios debido a la mayor disponibilidad de oxígeno y a una mayor concentración de biomasa consumiendo el sustrato. En contraste, el escenario con 25% de microalgas y 75% de agua residual mostró una remoción inferior debido a una menor cantidad de microorganismos, aunque su eficiencia de remoción aumentó con el tiempo al crecer y consumir más sustrato. Esto se refleja en la Figura 5, donde en el escenario 25% de microalgas-75% de agua residual, la biomasa tiende a aumentar hasta alcanzar una



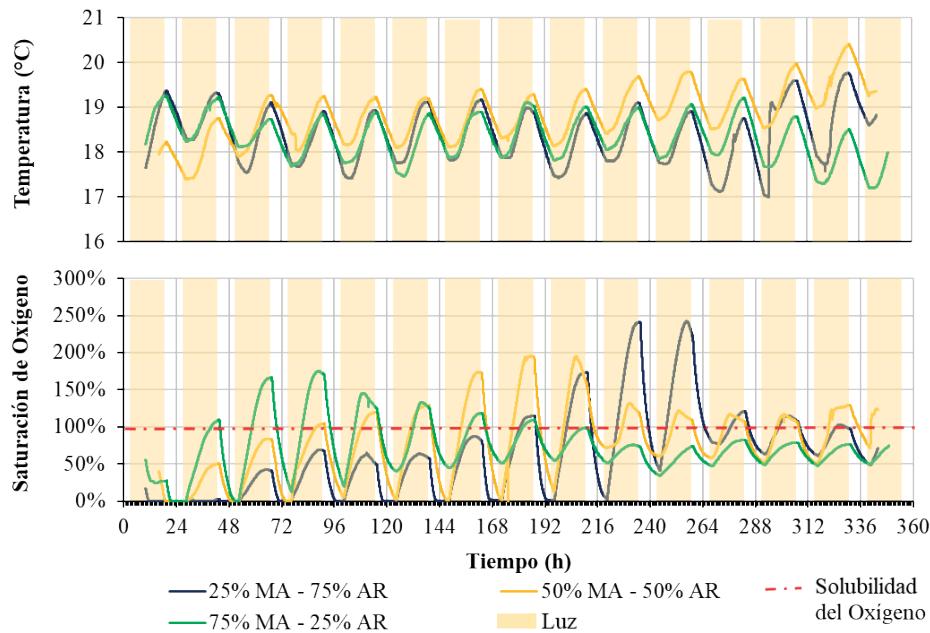

**Figura 6** | Temperatura del agua y saturación de oxígeno en función del tiempo.

remoción máxima del 83% en la hora 264, le sigue el escenario 75% de microalgas-25% de agua residual, que alcanzó una remoción máxima del 76% en la hora 144, y el escenario 50% de microalgas-50% de agua residual, con una remoción máxima del 70% con respecto a la concentración inicial de 346 mg/L, 218 mg/L y 252 mg/L de DQO, respectivamente.

Sin embargo, se observó un aumento en la DQO, lo que resultó en una disminución de la remoción. Este incremento se atribuyó a la liberación de compuestos orgánicos debido a la muerte de microorganismos y la liberación de productos extracelulares. Estos compuestos metabólicos de las microalgas, presentes en la fase estacionaria o en suspensión, contribuyen a la acumulación de DQO (Otondo *et al.*, 2018). La DQO restante corresponde a fracciones no biodegradables, lo que indica que la mayor parte de la DQO es biodegradable y es consumida por los microorganismos (Barreiro-Vescovo *et al.*, 2021).

La normativa colombiana establece los valores límites máximos permisibles en los vertimientos puntuales a través de la Resolución 631 de 2015 (Ministerio de Ambiente y Desarrollo Sostenible, 2015). Para la DQO permite una concentración máxima de 180 mg/L para agua residual con carga menor o igual a 625 kg/d de  $DBO_5$ . Los resultados en términos de concentración y remoción en los trece días de estudio de los tres escenarios evaluados se presentan en la Tabla 3.

**Tabla 3** | Concentración afluente y efluente para cada escenario evaluado. Se establece la concentración mínima alcanzada y la remoción respectiva tomando en cuenta el valor de DQO inicial y final. Por último, se especifica si la concentración final cumple o no el valor requerido por la normativa colombiana.

| Porcentaje del volumen total |               | Concentración afluente [mg/L] | Concentración mínima alcanzada [mg/L] | Concentración efluente [mg/L] | Remoción [%] | ¿Cumple valores establecidos en la Resolución 631/2015? |
|------------------------------|---------------|-------------------------------|---------------------------------------|-------------------------------|--------------|---------------------------------------------------------|
| Cultivo Microalgas           | Agua Residual |                               |                                       |                               |              |                                                         |
| 25%                          | 75%           | 346                           | 60                                    | 137                           | 60%          | Si                                                      |
| 50%                          | 50%           | 252                           | 76                                    | 88                            | 65%          | Si                                                      |
| 75%                          | 25%           | 218                           | 52                                    | 81                            | 63%          | Si                                                      |

## pH

La variación del pH se presenta en la Figura 7. En los tres escenarios se observó una tendencia general de disminución del pH, también se registraron aumentos puntuales relacionados con el fotoperiodo al que estuvieron expuestos. Durante el periodo de oscuridad, las bacterias heterótrofas llevaron a cabo la oxidación de materia orgánica, mientras que las microalgas realizaron respiración endógena, liberando  $\text{CO}_2$  y aumentando la acidez (Solimeno *et al.*, 2017). Por el contrario, en presencia de luz, las microalgas llevaron a cabo procesos fotosintéticos que consumieron  $\text{CO}_2$ , reduciendo la acidez y aumentando el pH (Wu *et al.*, 2022).

En cuanto al nitrógeno, medido como iones amonio ( $\text{NH}_4^+$ ) e iones nitrato ( $\text{NO}_3^-$ ), se encontró que el amonio es la forma preferida por las microalgas y su consumo afecta fuertemente el pH debido a la liberación de  $\text{H}^+$  por las bacterias que oxidan el amonio. Esto explicó la disminución del pH en los tres escenarios evaluados (Solimeno *et al.*, 2017). El escenario con mayor proporción de microalgas (75% de microalgas - 25% de agua residual) mostró una disminución más rápida del pH; asociado a su mayor población inicial de microalgas que consumieron el amonio, liberando  $\text{H}^+$  y acidificando el medio (ver Figura 10). En los otros escenarios, donde la proporción de agua residual era mayor, el consumo de amonio fue más lento debido a la menor población inicial de microalgas, permitiendo que el pH disminuyera más lentamente.

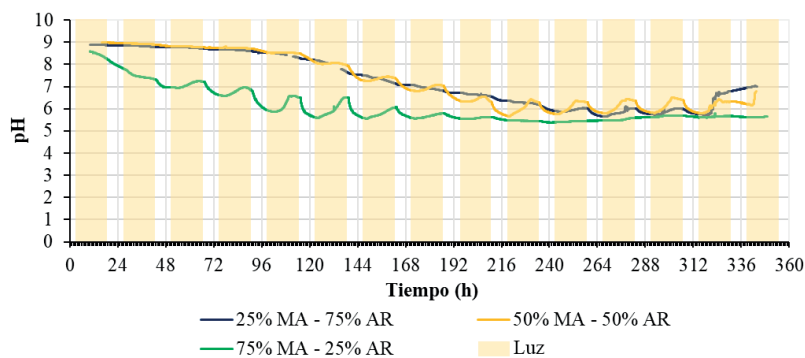

**Figura 7** | Comportamiento del pH en función del tiempo.

## Sólidos suspendidos totales

Los resultados, presentados en la Tabla 4, se obtuvieron a partir de la concentración de sólidos suspendidos totales, utilizada como indicador del crecimiento de la población de microalgas (ver Figura 8). En el escenario con 75% de microalgas y 25% de agua residual, se observó un cambio en el crecimiento a partir de la hora 264, este escenario mostró la menor producción de biomasa. La alta concentración inicial de microalgas en este caso podría haber llevado a un crecimiento más lento debido a la limitada disponibilidad de luz en el biorreactor, como consecuencia, la limitada actividad fotosintética inhibió la tasa de crecimiento de las microalgas.

En contraste, en el escenario con 25% de microalgas y 75% de agua residual, a pesar de tener una menor concentración inicial de microalgas, se obtuvo una mayor producción de biomasa al finalizar las 312 horas de prueba. Esto sugiere que una buena disponibilidad de luz y nutrientes condujo a una mayor producción de biomasa.

**Tabla 4** | Producción diaria de biomasa medida como sólidos suspendidos totales.

| Escenario                                | Biomasa producida [mg/L.d] |
|------------------------------------------|----------------------------|
| 25% de microalgas - 75% de agua residual | 13.41                      |
| 50% de microalgas - 50% de agua residual | 10.26                      |
| 75% de microalgas - 25% de agua residual | 7.38                       |

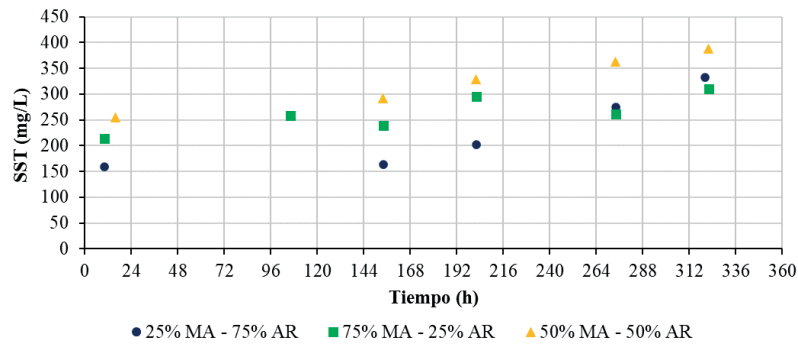

Figura 8 | Variación en la producción de biomasa medida como sólidos suspendidos totales en función del tiempo.

### Carbono inorgánico

En la Figura 9 se presenta el comportamiento de las dos formas de carbono inorgánico medido, dióxido de carbono ( $\text{CO}_2$ ) y bicarbonato ( $\text{HCO}_3^-$ ). Se observa que el  $\text{HCO}_3^-$  presenta una tendencia decreciente, mientras que el  $\text{CO}_2$  presenta una tendencia creciente en los tres escenarios.

Las microalgas usan carbono inorgánico en sus procesos metabólicos, fijando tanto  $\text{CO}_2$  como  $\text{HCO}_3^-$  durante su crecimiento. El  $\text{HCO}_3^-$  fue fijado en los tres escenarios hasta alcanzar concentraciones cercanas a cero. Sin embargo, el  $\text{CO}_2$  mostró una tendencia de aumento el cual podría ser resultado de la respiración endógena de las microalgas en la oscuridad, que produce  $\text{CO}_2$ , así como de la oxidación de materia orgánica por parte de las bacterias. La respiración de las microalgas está relacionada con su actividad fotosintética (González-Camejo *et al.*, 2020) y, por ende, con su producción de biomasa. Se puede afirmar que el  $\text{CO}_2$  no limitó el crecimiento de las microalgas en ninguno de los tres escenarios, dado que estuvo disponible en el medio sin requerir su inyección desde una fuente externa.

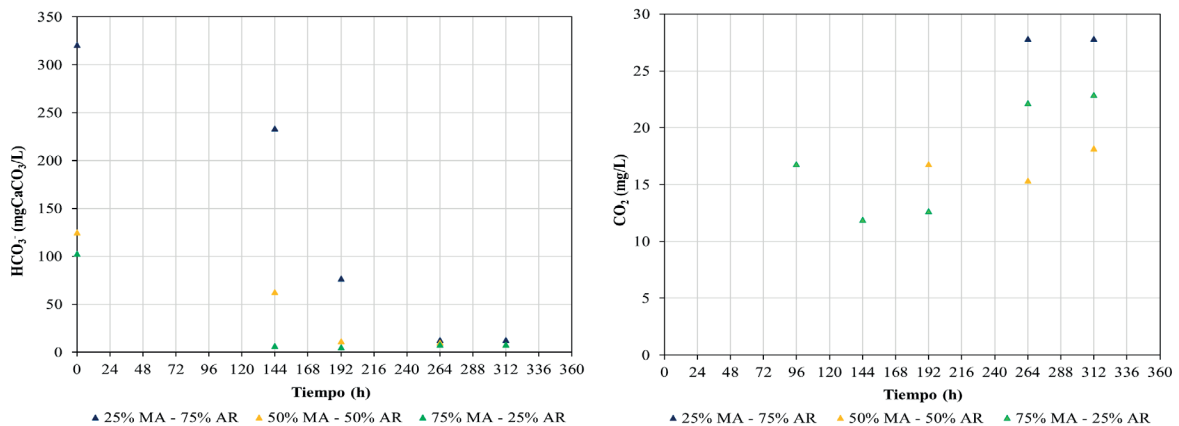

Figura 9 | Concentración de bicarbonato y dióxido de carbono en función del tiempo.

### Amonio y nitrato

La disminución de la concentración de amonio y el aumento simultáneo de la concentración de nitrato en los tres escenarios (ver Figura 10) indican un proceso de nitrificación, donde bacterias nitrificantes compiten con las microalgas por el amonio. El escenario con 25% de microalgas - 75% de agua residual mostró una mayor concentración final de nitrato, pues este no es fácilmente asimilable por las microalgas (López-Sánchez *et al.*, 2022). Este proceso de nitrificación de amonio fue más pronunciado en el

escenario 75% de microalgas – 25% de agua residual, este es el primer escenario en alcanzar la sobresaturación de oxígeno disuelto en el agua, facilitando la nitrificación en un corto periodo de tiempo. Cabe mencionar que las concentraciones efluente de amonio y nitrato deben reportarse según la normativa colombiana, la cual no cuenta con un valor máximo permisible según la Resolución 631 de 2015 (Ministerio de Ambiente y Desarrollo Sostenible, 2015).

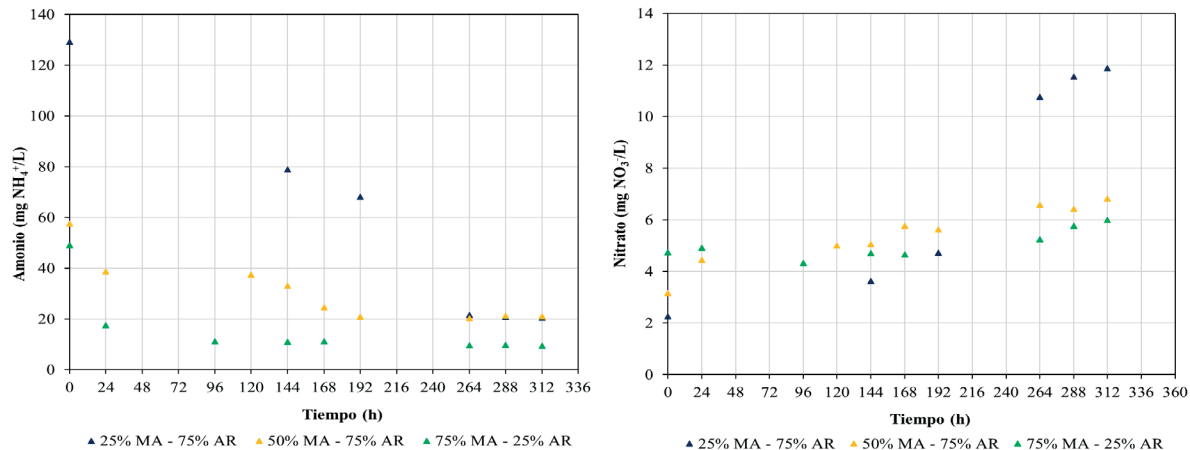

Figura 10 | Concentración de amonio y nitrato en función del tiempo.

## Modelación de crecimiento y remoción

### Modelo de Zambrano de 2016

Los resultados de la simulación para el crecimiento de las microalgas en función del tiempo para los tres escenarios se presentan en la Figura 11. Para el crecimiento de las microalgas, la menor dispersión entre los datos simulados y medidos ocurrió en el escenario 75% de microalgas – 25% de agua residual, seguido del 50% de microalgas – 50% de agua residual y, finalmente, el 25% de microalgas – 75% de microalgas, según la desviación estándar (Tabla 5). Las diferencias entre los datos simulados y experimentales pueden explicarse por la estructura del modelo. Este asumió que el crecimiento se debía únicamente al consumo de nitrógeno, sin considerar otros sustratos presentes en el cultivo mixotrófico, adicionalmente, las constantes de semisaturación se asumen como valores por defecto en el modelo. La incertidumbre en los métodos de medición de sólidos también puede influir en los valores calculados de producción.

### Modelo BIO\_ALGAE de 2017

Los resultados simulados (ver Figura 12) muestran un patrón de aumento en el crecimiento de las microalgas que no se ajusta precisamente a los valores experimentales obtenidos (ver Tabla 5). La simulación está influenciada por la concentración de microalgas y la tasa máxima de crecimiento, pero no considera el aporte de masa de bacterias vivas y/o muertas en la biomasa total de microalgas. El modelo asume constantes y coeficientes sin ajustarlos a los datos reales y no considera la atenuación de la luz debido a la alta concentración de microalgas, lo que puede inhibir el crecimiento.

El proceso de respiración endógena de microalgas se modela y se relaciona con los valores medidos de CO<sub>2</sub>, indicando un aumento en el tiempo. Además, el modelo considera la muerte de microalgas y muestra una mayor tasa de mortalidad a mayor concentración de microalgas en el medio. La modelación del proceso de transferencia de oxígeno coincide con el modelo de Zambrano, y ambos presentan los mismos resultados.

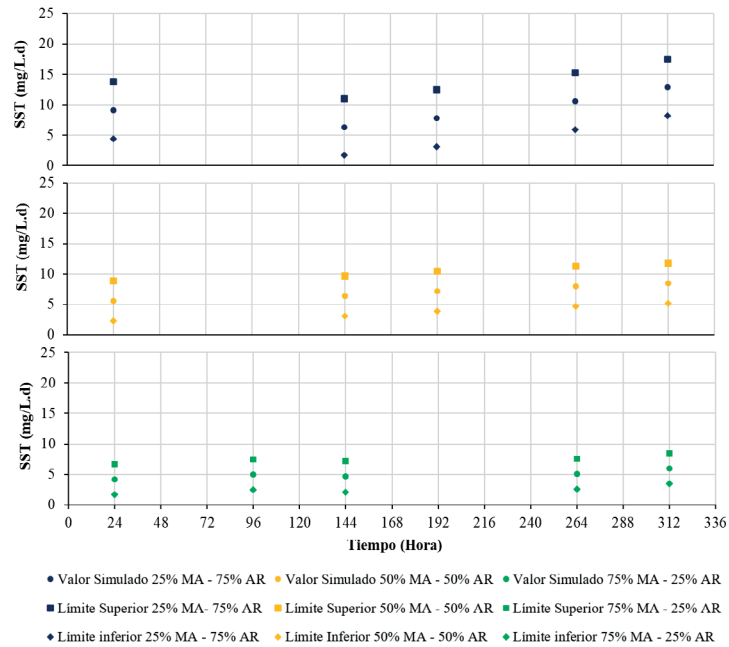

**Figura 11** | Resultados de la simulación con el modelo de Zambrano en cuanto a la producción de sólidos suspendidos totales en función del tiempo. Los límites se refieren a los valores resultantes  $\pm$  desviación estándar.

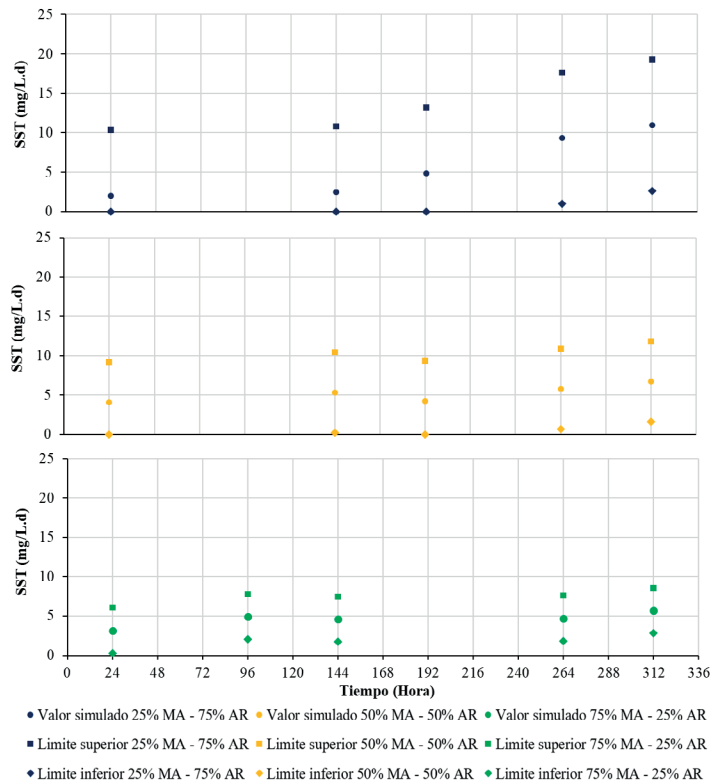

**Figura 12** | Resultados de la simulación con el modelo BIO\_ALGAE en cuanto a la producción de sólidos suspendidos totales en función del tiempo. Los límites se refieren a los valores resultantes  $\pm$  desviación estándar.



A pesar de las limitaciones, el modelo proporciona información útil sobre el crecimiento y el comportamiento de microalgas en diferentes escenarios. Sin embargo, es importante considerar las influencias y ajustar los parámetros para mejorar la precisión de las simulaciones y comprender mejor la dinámica del crecimiento de las microalgas.

**Tabla 5** | Producción de biomasa (mg/L.d) medida experimentalmente, junto con la desviación estándar (incertidumbre) hallada a partir de los valores resultantes de la simulación en el modelo de Zambrano y en el modelo BIO\_ALGAE.

| Escenario                                | Modelo Zambrano             |                        | Modelo BIO_ALGAE            |                        |
|------------------------------------------|-----------------------------|------------------------|-----------------------------|------------------------|
|                                          | Producción biomasa [mg/L.d] | Incertidumbre [mg/L.d] | Producción biomasa [mg/L.d] | Incertidumbre [mg/L.d] |
| 25% de microalgas - 75% de agua residual | 13.42                       | 4.66                   | 13.42                       | 8.33                   |
| 50% de microalgas - 50% de agua residual | 10.26                       | 3.30                   | 10.26                       | 5.10                   |
| 75% de microalgas - 25% de agua residual | 7.38                        | 2.50                   | 7.38                        | 2.88                   |

### Transferencia de oxígeno

El monitoreo del oxígeno disuelto en los diferentes escenarios evaluados ha permitido identificar que la reoxigenación asociada al cultivo de microalgas no corresponde con la descrita en los procesos aeróbicos con aireación difusa, es decir no tiene un comportamiento similar al de la función logarítmica, con un estado estacionario en la saturación. Los resultados indican que los datos de oxígeno hallados experimentalmente no se ajustan a los datos modelados, esta diferencia radica en la dificultad del modelo matemático usado por la ASCE para minimizar el error entre los datos observados y modelados.

### Consideración final

El uso de consorcio microalgas-bacterias resultó ser efectivo para el tratamiento de agua residual siendo el escenario 25% de microalgas – 75% de agua residual por su mayor eficiencia de remoción y producción de biomasa. El modelo de Zambrano fue el más preciso, partiendo de los valores de desviación estándar como indicador de precisión en la predicción. Se identificó que los modelos no representan las remociones de los parámetros de calidad del agua lo cual indica información faltante para su aplicación al tratamiento de agua residual. La transferencia de oxígeno en este tipo de procesos biológicos aún no se predice considerando la sobresaturación y las condiciones locales, aspectos que deben ser incluidos en la modelación de dichos procesos. Para trabajo futuro, se debe minimizar la información asumida, priorizando la correcta medición de las variables, con el fin de reducir la incertidumbre de los resultados y, así, poder validar los modelos con mayor exactitud.

## CONCLUSIONES

En el contexto del tratamiento de agua residual institucional en la Sabana de Bogotá, se compararon datos experimentales con dos modelos de consorcio microalgas-bacterias. Los modelos funcionan como referencia para conocer el crecimiento de la biomasa, pero no pueden predecir cambios en la calidad del agua. El modelo de Zambrano se ajustó con mayor exactitud con los datos experimentales en la producción de biomasa, mientras que el modelo BIO\_ALGAE tuvo más variaciones debido a información asumida y a la falta de mediciones precisas de factores clave. Se observó remoción de DQO con los resultados más altos en el escenario de 25% de microalgas y 75% de agua residual (partiendo de la remoción máxima alcanzada), sin embargo, los tres escenarios demostraron tener una eficiencia de eliminación suficiente de acuerdo con lo solicitado por la normativa colombiana. Para el caso del amonio y nitrato las concentraciones efluente no cuentan con un máximo permisible según la Resolución 631 de 2015 (Ministerio de Ambiente y Desarrollo Sostenible, 2015) por cual solo se reportan a las autoridades competentes. Es necesario mencionar que, aunque la inyección de CO<sub>2</sub> suele inyectarse en el medio para aumentar la producción de biomasa, en este estudio no fue un factor limitante, ya que no se realizó desde fuentes externas.

A pesar de que se demostró la producción de biomasa y la mejora en la calidad del agua tratada, se reconoce que los modelos actuales de producción de microalgas aún no son viables para aplicaciones de tratamiento de agua residual, debido a la falta de exactitud en la predicción de cambios en la calidad del agua. Estos resultados contribuyen a comprender mejor el comportamiento del consorcio microalgas-bacterias en el tratamiento de agua residual. Se recomienda seguir investigando y refinando los modelos para lograr una mayor eficiencia en su aplicación práctica.

## REFERENCIAS

- Aditya, L., Mahlia, T.M. I., Nguyen, L.N., Vu, H.P., Nghiem, L.D. (2022). Microalgae-bacteria consortium for wastewater treatment and biomass production. *Science of The Total Environment*, 838. <https://doi.org/10.1016/J.SCITOTENV.2022.155871>.
- Alam, M.A., Wang, Z. 2019. *Microalgae biotechnology for development of biofuel and wastewater treatment*. Springer Singapore, Guangzhou, China. <https://doi.org/10.1007/978-981-13-2264-8>
- American Society of Civil Engineers. 2007. *Measurement of Oxygen Transfer in Clean Water*. American Society of Civil Engineers, Reston, Virginia, USA.
- Baird, R., Bridgewater, L. 2017. *Standard methods for the examination of water and wastewater*. American Public Health Association. Washington, D.C., USA.
- Baquero, G.A., Martínez, S., Acuña, J., Nolasco, D., Rosso, D. 2022. How elevation dictates technology selection in biological wastewater treatment. *Journal of Environmental Management*, 307, 114588, <https://doi.org/10.1016/J.JENVMAN.2022.114588>.
- Barceló-Villalobos, M., Guzmán, J.L., Martín, I., Sánchez, J.A., Acién, F.G. 2018. Analysis of mass transfer capacity in raceway reactors. *Algal Research*, 35, 91–97, <https://doi.org/10.1016/J.ALGAL.2018.08.017>
- Barreiro-Vescovo, S., González-Fernández, C., de Godos, I. 2021. Characterization of communities in a microalgae-bacteria system treating domestic wastewater reveals dominance of phototrophic and pigmented bacteria. *Algal Research*, 59, 102447, <https://doi.org/10.1016/J.ALGAL.2021.102447>
- Bhatia, S.K., Mehariya, S., Bhatia, R.K., Kumar, M., Pugazhendhi, A., Awasthi, M.K., Atabani, A.E., Kumar, G., Kim, W., Seo, S.O., Yang, Y.H. 2021. Wastewater based microalgal biorefinery for bioenergy production: Progress and challenges. *Science of The Total Environment*, 751, 141599, <https://doi.org/10.1016/J.SCITOTENV.2020.141599>
- Calicioglu, O., Demirer, G.N. 2022. Role of microalgae in circular economy. In: *Integrated Wastewater Management and Valorization Using Algal Cultures*. Elsevier, Okemos, MI, USA, 1–12. <https://doi.org/10.1016/B978-0-323-85859-5.00003-8>
- González-Camejo, J., Robles, A., Seco, A., Ferrer, J., Ruano, M.V. (2020). Online monitoring of photosynthetic activity based on pH data to assess microalgae cultivation. *Journal of Environmental Management*, 276, 111343, <https://doi.org/10.1016/J.JENVMAN.2020.111343>.
- Jacob-Lopes, E., Manzoni, M., Queiroz, L. 2020. *Handbook of Microalgae-Based Processes and Products*. Elsevier, Santa Maria, RS, Brazil.
- Javed, F., Aslam, M., Rashid, N., Shamair, Z., Khan, A.L., Yasin, M., Fazal, T., Hafeez, A., Rehman, F., Rehman, M.S.U., Khan, Z., Iqbal, J., Bazmi, A.A. 2019. Microalgae-based biofuels, resource recovery and wastewater treatment: A pathway towards sustainable biorefinery. *Fuel*, 255, 115826, <https://doi.org/10.1016/J.FUEL.2019.115826>.
- Krause, D., Benson, B. 1984. The concentration and isotopic fractionation of oxygen dissolved in freshwater and seawater in equilibrium with the atmosphere. *Limnology and Oceanography*, 29(3), 620–632. <https://doi.org/10.4319/lo.1984.29.3.0620>
- Lee, S.A., Lee, N., Oh, H.M., Ahn, C.Y. 2019. Enhanced and Balanced Microalgal Wastewater Treatment (COD, N, and P) by Interval Inoculation of Activated Sludge. *Journal of Microbiology and Biotechnology*, 29(9), 1434–1443. <https://doi.org/10.4014/JMB.1905.05034>

- López-Sánchez, A., Silva-Gálvez, A.L., Aguilar-Juárez, Ó., Senés-Guerrero, C., Orozco-Nunnelly, D.A., Carrillo-Nieves, D., Gradilla-Hernández, M.S. 2022. Microalgae-based livestock wastewater treatment (MbWT) as a circular bioeconomy approach: Enhancement of biomass productivity, pollutant removal and high-value compound production. *Journal of Environmental Management*, 308, 114612. <https://doi.org/10.1016/J.JENVMAN.2022.114612>
- Matsuki, N., Ishikawa, T., Ichiba, S., Shiba, N., Ujike, Y., Yamaguchi, T. 2014. Oxygen supersaturated fluid using fine micro/nanobubbles. *International Journal of Nanomedicine*, 9, 4495, <https://doi.org/10.2147/IJN.S68840>
- Metcalf, L., Eddy, P. 2013. Energy Considerations in Wastewater Management. In: *Wastewater Engineering: Treatment and Resource*. McGraw-Hill Education, Penn Plaza, New York, USA, 1809-1815.
- Ministerio de Ambiente y Desarrollo Sostenible. 2015, March 17. Resolución 631 del 2015. <https://www.alcaldiabogota.gov.co/sisjur/normas/Norma1.jsp?i=70346>
- Molinuevo-Salces, B., Riaño, B., Hernández, D., García-González, M.C. 2019. Microalgae and wastewater treatment: Advantages and disadvantages. In *Microalgae Biotechnology for Development of Biofuel and Wastewater Treatment* (pp. 505–533). Springer Singapore. [https://doi.org/10.1007/978-981-13-2264-8\\_20/COVER](https://doi.org/10.1007/978-981-13-2264-8_20/COVER)
- Núñez-Avellaneda, M. 2008. Microalgas acuáticas: la otra escala de la biodiversidad en la Amazonia colombiana. Instituto Amazónico de Investigaciones Científicas, SINCHI. Bogotá, Colombia.
- Onyeaka, H., Miri, T., Obileke, K., Hart, A., Anumudu, C., Al-Sharify, Z.T. 2021. Minimizing carbon footprint via microalgae as a biological capture. *Carbon Capture Science & Technology*, 1, 100007, <https://doi.org/10.1016/J.CCST.2021.100007>
- Otondo, A., Kokabian, B., Stuart-Dahl, S., Gude, V.G. 2018. Energetic evaluation of wastewater treatment using microalgae, *Chlorella vulgaris*. *Journal of Environmental Chemical Engineering*, 6(2), 3213–3222. <https://doi.org/10.1016/j.jece.2018.04.064>
- Reichert, P., Borchardt, D., Henze, M., Rauch, W., Shanahan, P., Somlyódy, L., Vanrolleghem, P. 2001. River Water Quality Model no. 1 (RWQM1): II. Biochemical process equations. *Water Science and Technology*, 43(5), 11–30. <https://doi.org/10.2166/wst.2001.0241>
- Roy Chong, J.W., Tan, X., Khoo, K.S., Ng, H.S., Jonglertjunya, W., Yew, G.Y., Show, P.L. 2022. Microalgae-based bioplastics: Future solution towards mitigation of plastic wastes. *Environmental Research*, 206, 112620, <https://doi.org/10.1016/J.ENVRES.2021.112620>.
- Sahu, S.N., Sahoo, N.K., Naik, S.N. 2019. Phycoremediation Technology: A Global prospective. In: Gupta, S.K., Bux, F. (eds) *Application of Microalgae in Wastewater Treatment*. Springer, Cham. [https://doi.org/10.1007/978-3-030-13913-1\\_1](https://doi.org/10.1007/978-3-030-13913-1_1)
- Singh, P., Gupta, S.K., Guldhe, A., Rawat, I., Bux, F. 2015. Microalgae Isolation and Basic Culturing Techniques. In: *Handbook of Marine Microalgae: Biotechnology Advances*. Academic Press, Durban, South Africa, 43–54. <https://doi.org/10.1016/B978-0-12-800776-1.00004-2>
- Solimeno, A., Parker, L., Lundquist, T., García, J. 2017. Integral microalgae-bacteria model (BIO\_ALGAE): Application to wastewater high rate algal ponds. *Science of The Total Environment*, 601-602, 646-657. <https://doi.org/10.1016/j.scitotenv.2017.05.215>
- Takahashi, M., Chiba, K., Li, P. 2007. Free-Radical Generation from Collapsing Microbubbles in the Absence of a Dynamic Stimulus. *Journal of Physical Chemistry B*, 111(6), 1343–1347. <https://doi.org/10.1021/jp0669254>
- Tomasso, J.R. 1997. Environmental Requirements and Noninfectious Diseases. *Developments in Aquaculture and Fisheries Science*, 30(C), 253–270. [https://doi.org/10.1016/S0167-9309\(97\)80012-9](https://doi.org/10.1016/S0167-9309(97)80012-9)
- Van Vuuren, S.J., Taylor, J., van Ginkel, C., Gerber, A. 2006. *Easy identification of the most common freshwater algae. A guide for the identification of microscopic algae in South African freshwaters*. North-West University and the Department of Water Affairs. Johannesburg.
- Taylor, A.G., van Ginkel, C. 2006. *African Journal of Aquatic Science*, 32(3), 317–318. <https://doi.org/10.2989/AJAS.2007.32.3.13.330>

- Von Sperling, M. 2007. Wastewater Characteristics, Treatment and Disposal. In *Water Intelligence Online* (Vol. 6, Issue 0). IWA Publishing. <https://doi.org/10.2166/9781780402086>
- Wu, J., Bian, J., Wan, H., Ma, Y., Sun, X. 2021. Health risk assessment of groundwater nitrogen pollution in Songnen Plain. *Ecotoxicology and Environmental Safety*, 207, 111245. <https://doi.org/10.1016/J.ECOENV.2020.111245>
- Wu, M., Wu, G., Lu, F., Wang, H., Lei, A., Wang, J. 2022. Microalgal photoautotrophic growth induces pH decrease in the aquatic environment by acidic metabolites secretion. *Biotechnology for Biofuels and Bioproducts*, 15(1), 1–13. <https://doi.org/10.1186/s13068-022-02212-z>
- Zambrano, J., Krustok, I., Nehrenheim, E., Carlsson, B. 2016. A simple model for algae-bacteria interaction in photo-bioreactors. *Algal Research*, 19, 155–161, <https://doi.org/10.1016/J.ALGAL.2016.07.022>
- Zhao, S., Ding, Y.D., Liao, Q., Zhu, X., Huang, Y. 2015. Experimental and theoretical study on dissolution of a single mixed gas bubble in a microalgae suspension. *RSC Advances*, 5(41), 32615–32625. <https://doi.org/10.1039/C5RA03905C>
